# Supplementary material for: G×G×E for Lifespan in Drosophila: Mitochondrial, Nuclear, and Dietary Interactions that Modify Longevity
Source: PLoS Genet. 2014 May 15;10(5):e1004354. doi: 10.1371/journal.pgen.1004354 (PMC4022469; doi:10.1371/journal.pgen.1004354)
Supplement: Table S1 — Amino Acid polymorphisms among the mitotypes. "." indicates indentical sequence to the reference (Zim53). (PDF) [file pgen.1004354.s002.pdf]

Table S1. Amino Acid polymorphisms among the mitotypes. "." indicates indentical sequence to the reference (Zim53).

|                       |                   | 1                  |  | 10   |    |     |     |     |     |     |     |     |     | 20       |     |     |     |     |    |     |     |     |     | 30       |     |     |     |     |     |     |     |     |     | 40   |     |     |     |     |     |     |     |     |     |      |  |
|-----------------------|-------------------|--------------------|--|------|----|-----|-----|-----|-----|-----|-----|-----|-----|----------|-----|-----|-----|-----|----|-----|-----|-----|-----|----------|-----|-----|-----|-----|-----|-----|-----|-----|-----|------|-----|-----|-----|-----|-----|-----|-----|-----|-----|------|--|
|                       |                   | Gene:              |  | ND2  |    |     |     |     |     |     |     |     |     | COX1     |     |     |     |     |    |     |     |     |     | COX2     |     |     |     |     |     |     |     |     |     | ATP8 |     |     |     |     |     |     |     |     |     | ATP6 |  |
|                       |                   | Position:          |  | 65   | 84 | 142 | 148 | 192 | 196 | 198 | 274 | 276 | 277 | 313      | 315 | 317 | 321 | 333 | 1  | 127 | 411 | 450 | 468 | 115      | 129 | 130 | 143 | 165 | 218 | 26  | 32  | 34  | 17  | 28   | 45  | 115 | 119 | 137 | 177 | 180 | 185 | 187 | 192 |      |  |
| <i>D.melanogaster</i> | Zim53             |                    |  | V    | M  | S   | F   | I   | I   | L   | M   | T   | L   | N        | I   | Y   | M   | L   | S  | F   | H   | I   | F   | N        | M   | T   | V   | V   | Y   | I   | M   | N   | F   | L    | M   | L   | I   | I   | N   | P   | I   | V   | M   |      |  |
|                       | OreR              |                    |  | .    | .  | .   | Y   | .   | .   | .   | .   | I   | .   | .        | .   | .   | .   | .   | S  | Y   | .   | .   | .   | .        | .   | .   | .   | .   | .   | .   | .   | .   | .   | .    | .   | .   | .   | K   | S   | M   | M   | .   |     |      |  |
|                       | <i>D.simulans</i> | sill (SM21 & w501) |  | A    | L  | T   | Y   | .   | V   | F   | L   | L   | M   | I        | S   | T   | L   | M   | P  | Y   | Q   | V   | Y   | .        | S   | I   | I   | I   | H   | .   | .   | D   | L   | .    | V   | .   | F   | .   | .   | .   | L   | .   | T   |      |  |
|                       |                   | sil                |  | A    | L  | .   | Y   | F   | .   | .   | L   | .   | .   | I        | N   | T   | L   | M   | P  | Y   | Q   | .   | .   | S        | T   | .   | I   | .   | H   | M   | I   | .   | L   | I    | V   | M   | .   | V   | .   | .   | L   | I   | T   |      |  |
|                       |                   |                    |  | 41   |    |     |     |     |     |     |     |     |     | 50       |     |     |     |     |    |     |     |     |     | 60       |     |     |     |     |     |     |     |     |     | 70   |     |     |     |     |     |     |     |     |     | 80   |  |
|                       |                   |                    |  | COX3 |    |     |     |     |     |     |     |     |     | ND3      |     |     |     |     |    |     |     |     |     | ND5      |     |     |     |     |     |     |     |     |     | ND4  |     |     |     |     |     |     |     |     |     |      |  |
|                       |                   |                    |  | 41   | 45 | 92  | 170 | 172 | 176 | 193 | 199 | 20  | 29  | 81       | 7   | 8   | 12  | 27  | 36 | 42  | 65  | 77  | 81  | 149      | 152 | 179 | 184 | 244 | 289 | 422 | 462 | 466 | 470 | 476  | 500 | 516 | 539 | 557 | 567 | 568 | 569 | 9   | 12  |      |  |
|                       | Zim53             |                    |  | I    | V  | V   | M   | I   | I   | I   | F   | F   | A   | M        | V   | N   | M   | D   | L  | M   | S   | M   | H   | L        | S   | M   | V   | M   | L   | M   | V   | F   | I   | F    | I   | V   | M   | L   | L   | .   | I   | L   | I   |      |  |
|                       | OreR              |                    |  | .    | .  | .   | L   | .   | .   | .   | .   | .   | .   | .        | .   | .   | .   | .   | .  | .   | .   | .   | .   | .        | .   | .   | .   | .   | .   | .   | .   | .   | .   | .    | M   | .   | .   | .   | .   | .   | .   | .   | .   |      |  |
|                       | sill              |                    |  | M    | L  | .   | L   | V   | M   | V   | Y   | I   | .   | .        | I   | Y   | I   | N   | V  | S   | A   | S   | N   | F        | A   | V   | M   | L   | F   | .   | .   | S   | .   | Y    | .   | I   | T   | M   | M   | N   | F   | V   | S   |      |  |
|                       | sil               |                    |  | M    | L  | I   | L   | V   | M   | V   | Y   | I   | G   | I        | I   | Y   | I   | N   | V  | S   | A   | S   | N   | F        | A   | .   | M   | L   | .   | L   | M   | .   | V   | Y    | .   | I   | T   | M   | M   | N   | F   | .   | T   |      |  |
|                       |                   |                    |  | 81   |    |     |     |     |     |     |     |     |     | 90       |     |     |     |     |    |     |     |     |     | 100      |     |     |     |     |     |     |     |     |     | 110  |     |     |     |     |     |     |     |     |     |      |  |
|                       |                   |                    |  |      |    |     |     |     |     |     |     |     |     | ND4L ND6 |     |     |     |     |    |     |     |     |     | Cytb ND1 |     |     |     |     |     |     |     |     |     |      |     |     |     |     |     |     |     |     |     |      |  |
|                       |                   |                    |  | 14   | 17 | 29  | 37  | 78  | 82  | 94  | 141 | 231 | 236 | 298      | 383 | 386 | 426 | 57  | 79 | 39  | 82  | 86  | 90  | 93       | 96  | 100 | 101 | 102 | 107 | 159 | 109 | 357 | 170 | 186  | 190 | 191 | 270 |     |     |     |     |     |     |      |  |
|                       | Zim53             |                    |  | F    | I  | F   | L   | M   | H   | I   | L   | M   | S   | C        | L   | F   | L   | S   | V  | L   | M   | L   | L   | I        | L   | F   | I   | M   | S   | I   | K   | V   | F   | A    | M   | S   | V   |     |     |     |     |     |     |      |  |
|                       | OreR              |                    |  | .    | .  | .   | .   | .   | .   | .   | .   | .   | .   | .        | .   | .   | .   | .   | .  | .   | .   | .   | .   | .        | .   | .   | .   | .   | .   | .   | .   | .   | .   | .    | V   | .   | .   | .   | .   | .   | .   |     |     |      |  |
|                       | sill              |                    |  | L    | .  | .   | .   | S   | Y   | V   | V   | .   | A   | S        | M   | L   | F   | N   | .  | M   | I   | V   | F   | .        | .   | .   | .   | I   | .   | V   | M   | .   | .   | G    | L   | T   | I   |     |     |     |     |     |     |      |  |
|                       | sil               |                    |  | L    | M  | V   | V   | S   | Y   | V   | V   | L   | A   | S        | M   | L   | F   | N   | I  | M   | I   | V   | .   | L        | M   | L   | V   | I   | F   | V   | M   | I   | Y   | .    | L   | T   | A   |     |     |     |     |     |     |      |  |
